# Supplementary material
Source: publisher site journal article supplement (https://bdj.pensoft.net/article/download/suppl/3653695/)
Supplement: Supplementary file 1 [file  › doc.kml]

<?xml version="1.0" encoding="UTF-8"?>
<kml xmlns="http://www.opengis.net/kml/2.2" xmlns:gx="http://www.google.com/kml/ext/2.2" xmlns:xsi="http://www.w3.org/2001/XMLSchema-instance"
 xsi:schemaLocation="http://www.opengis.net/kml/2.2 http://schemas.opengis.net/kml/2.2.0/ogckml22.xsd http://www.google.com/kml/ext/2.2 http://code.google.com/apis/kml/schema/kml22gx.xsd">
<Document id="Trechus_torretassoi">
  <name>Trechus_torretassoi</name>
  <Snippet></Snippet>
  <Folder id="FeatureLayer0">
    <name>Trechus_torretassoi</name>
    <Snippet></Snippet>
    <Placemark id="ID_00000">
      <name>Trechus torretassoi</name>
      <Snippet></Snippet>
      <description><![CDATA[<html xmlns:fo="http://www.w3.org/1999/XSL/Format" xmlns:msxsl="urn:schemas-microsoft-com:xslt">

<head>

<META http-equiv="Content-Type" content="text/html">

<meta http-equiv="content-type" content="text/html; charset=UTF-8">

</head>

<body style="margin:0px 0px 0px 0px;overflow:auto;background:#FFFFFF;">

<table style="font-family:Arial,Verdana,Times;font-size:12px;text-align:left;width:100%;border-collapse:collapse;padding:3px 3px 3px 3px">

<tr style="text-align:center;font-weight:bold;background:#9CBCE2">

<td>Trechus torretassoi</td>

</tr>

<tr>

<td>

<table style="font-family:Arial,Verdana,Times;font-size:12px;text-align:left;width:100%;border-spacing:0px; padding:3px 3px 3px 3px">

<tr>

<td>FID</td>

<td>0</td>

</tr>

<tr bgcolor="#D4E4F3">

<td>Id</td>

<td>0</td>

</tr>

<tr>

<td>ID_NO</td>

<td>0</td>

</tr>

<tr bgcolor="#D4E4F3">

<td>BINOMIAL</td>

<td>Trechus torretassoi</td>

</tr>

<tr>

<td>PRESENCE</td>

<td>1</td>

</tr>

<tr bgcolor="#D4E4F3">

<td>ORIGIN</td>

<td>1</td>

</tr>

<tr>

<td>SEASONAL</td>

<td>1</td>

</tr>

<tr bgcolor="#D4E4F3">

<td>COMPILER</td>

<td>Anja Danielczak</td>

</tr>

<tr>

<td>YEAR</td>

<td>2017</td>

</tr>

<tr bgcolor="#D4E4F3">

<td>CITATION</td>

<td>Paulo Borges</td>

</tr>

</table>

</td>

</tr>

</table>

</body>

</html>

]]></description>
      <styleUrl>#PolyStyle00</styleUrl>
      <MultiGeometry>
        <Polygon>
          <extrude>0</extrude>          <altitudeMode>clampToGround</altitudeMode>
          <outerBoundaryIs><LinearRing><coordinates> -25.33588837459763,37.74967817621555,0 -25.33584081215799,37.74970276365235,0 -25.33579806616243,37.74972886740071,0 -25.33576015225317,37.74975647723861,0 -25.33572708737289,37.74978558079865,0 -25.33569888433827,37.74981616676049,0 -25.33566651211483,37.74986125712341,0 -25.33563763664962,37.74991354405682,0 -25.33561244559044,37.74997269328824,0 -25.33559118349384,37.75003813497241,0 -25.33557396752477,37.75010977024132,0 -25.33556133031985,37.75018570287764,0 -25.33555357270898,37.75026418563209,0 -25.33555099650654,37.75034223505203,0 -25.33555424916995,37.75041279147723,0 -25.33556383500943,37.75048634445759,0 -25.33557963138071,37.75056195118401,0 -25.33560142734529,37.75063859970734,0 -25.33562891807308,37.75071523076228,0 -25.3356617510306,37.75079087095489,0 -25.33569950720527,37.75086455676479,0 -25.3357417468804,37.75093543123408,0 -25.33578734635561,37.75100182086496,0 -25.33583642766546,37.75106409609133,0 -25.3358885631076,37.75112171547394,0 -25.33594337058325,37.75117425794984,0 -25.33600040080061,37.7512213091284,0 -25.33605940784252,37.75126268189199,0 -25.33612008904935,37.75129816467727,0 -25.33618218867776,37.75132760866082,0 -25.33622203800567,37.75134233049784,0 -25.33626859393938,37.75135571135524,0 -25.33632136487667,37.75136790214248,0 -25.33647952958684,37.75140036980773,0 -25.33652753006413,37.75141289860245,0 -25.33656869695051,37.75142636338841,0 -25.33661759270859,37.75144569342179,0 -25.33666614744303,37.75146757684843,0 -25.33671442756422,37.75149204347572,0 -25.33676251744763,37.7515191359653,0 -25.33681047317855,37.7515488824682,0 -25.33685845744672,37.75158138050391,0 -25.33690661246468,37.75161672595402,0 -25.33695514163639,37.75165506781645,0 -25.33704815007991,37.75173585154375,0 -25.33714646336309,37.75183061493078,0 -25.33724663600549,37.7519348886326,0 -25.33741728026449,37.75212027633101,0 -25.33744116192955,37.75214743212608,0 -25.33746406853075,37.75217627734563,0 -25.33750714482456,37.75223927967995,0 -25.33754692490027,37.7523098773891,0 -25.33758411330748,37.75238931304161,0 -25.33761394967069,37.75246408016594,0 -25.33764386400211,37.75254953721684,0 -25.33773598803464,37.75285046111328,0 -25.33777403957006,37.7529639919611,0 -25.33779619150378,37.75302207222737,0 -25.33781865757213,37.75307479521861,0 -25.33784186586218,37.75312316180025,0 -25.33786605939335,37.75316767136086,0 -25.3378973372009,37.75321748384561,0 -25.3379306730088,37.75326250483401,0 -25.33796629887522,37.75330304633932,0 -25.3380043863404,37.75333930162388,0 -25.33804514982196,37.75337146135841,0 -25.33808867082353,37.75339957705268,0 -25.33813507257079,37.75342372798835,0 -25.33818445863434,37.75344396767554,0 -25.33823018378482,37.75345893859252,0 -25.33828343216846,37.75347361257207,0 -25.33847435244037,37.753518026862,0 -25.33859679321673,37.75354445599351,0 -25.33873640820728,37.7535679718115,0 -25.33888039124826,37.75358751092761,0 -25.33926527273516,37.75363395017125,0 -25.33937788163535,37.75365044306472,0 -25.33947683765569,37.75366780729092,0 -25.33958696126721,37.75369168030566,0 -25.33968594457553,37.75371877256739,0 -25.33977576478248,37.75374962934643,0 -25.33985738064449,37.75378458894335,0 -25.33990295075896,37.75380848859803,0 -25.33994680816397,37.75383587995798,0 -25.33998904866402,37.75386682252002,0 -25.34002979041015,37.75390140256449,0 -25.3400691092367,37.75393967393936,0 -25.34010722661949,37.75398184153296,0 -25.34014432731089,37.75402810819752,0 -25.34018067573604,37.75407880265118,0 -25.34020937023975,37.75412275223187,0 -25.34023803779385,37.75417018748838,0 -25.34029676269469,37.75427800181159,0 -25.34034951954548,37.7543851793207,0 -25.34047320706704,37.75464872525782,0 -25.34054046999941,37.75478008167787,0 -25.3405762608403,37.75484298191643,0 -25.34061176476527,37.7549000732207,0 -25.34064756400867,37.75495228901601,0 -25.34068398842759,37.75500010516383,0 -25.34072356482459,37.75504636333694,0 -25.34076438334012,37.75508835817193,0 -25.3408066436277,37.75512629440811,0 -25.34085049455946,37.75516030476603,0 -25.34089611354876,37.75519051972506,0 -25.34094357220961,37.7552169797555,0 -25.34099297316146,37.75523974187649,0 -25.34104440182397,37.7552588452079,0 -25.34111903192289,37.75528204605757,0 -25.34119338337595,37.75530242908307,0 -25.34126555235683,37.75531947454875,0 -25.3413343079527,37.75533289467438,0 -25.3414242797997,37.75534505716487,0 -25.34151794065672,37.75535107072978,0 -25.34161504006439,37.75535091886511,0 -25.34171526270122,37.75534460171551,0 -25.34181834920893,37.75533212696796,0 -25.34192376458393,37.75531355100847,0 -25.34203101253229,37.75528896061356,0 -25.34213947635443,37.75525849659956,0 -25.34225001250449,37.75522180029238,0 -25.34236023947443,37.75517954432734,0 -25.34246922632432,37.75513208461425,0 -25.34257588197553,37.75507989532341,0 -25.34267923252379,37.75502343756338,0 -25.3427778369493,37.75496348245285,0 -25.34287043596663,37.75490079518207,0 -25.34295576110822,37.75483623365098,0 -25.34300710527131,37.75479357211485,0 -25.34305807066181,37.75474827957327,0 -25.34310810125258,37.75470085049631,0 -25.34315669834593,37.75465175792447,0 -25.34320334016684,37.75460153559086,0 -25.34324770707154,37.754550534566,0 -25.34328945534226,37.75449915037802,0 -25.34332831024254,37.75444772163797,0 -25.34336368377782,37.75439708648862,0 -25.34339581367198,37.75434696955364,0 -25.34342455115062,37.75429760324966,0 -25.3434497855535,37.75424917812296,0 -25.34347141334875,37.75420189917182,0 -25.3434893891953,37.75415587293998,0 -25.34350366384865,37.75411122587661,0 -25.34351420466336,37.75406806061264,0 -25.34352200630726,37.75401279939459,0 -25.34352322840981,37.75395552088861,0 -25.34351787252835,37.7538961646649,0 -25.34350593141863,37.75383464824765,0 -25.34348740259612,37.75377092204069,0 -25.34346224002744,37.75370480443888,0 -25.34343038179771,37.75363613045771,0 -25.3433917106912,37.75356464620064,0 -25.34334973294427,37.75349575519106,0 -25.34330152560207,37.75342376653224,0 -25.34324673260367,37.75334814239152,0 -25.34318455992559,37.75326778416753,0 -25.34312459987914,37.75319408530692,0 -25.34305600676955,37.75311287742072,0 -25.34278012817905,37.75279627663237,0 -25.34270712723029,37.7527153738188,0 -25.34262744046138,37.75263678738864,0 -25.3425408995005,37.75256035067558,0 -25.34244727149281,37.75248585757261,0 -25.34234640488274,37.75241317254566,0 -25.3422377845472,37.7523419107749,0 -25.34212091470516,37.7522717452878,0 -25.34199502059191,37.75220220987456,0 -25.34188358356903,37.75214488747063,0 -25.34176436690461,37.75208712710302,0 -25.34163616424449,37.75202834037393,0 -25.34149658759644,37.75196743040299,0 -25.34122623469767,37.75185581206649,0 -25.3407200993737,37.75165563716892,0 -25.34052075203677,37.75157522746491,0 -25.34031969179256,37.75149066694075,0 -25.34014226811465,37.75141158727992,0 -25.34004365233507,37.75136520941636,0 -25.33995018345915,37.75131928194955,0 -25.33986126512636,37.75127351149421,0 -25.33977650780643,37.75122769698406,0 -25.33969549182982,37.75118160725955,0 -25.3396180889931,37.75113516478864,0 -25.33954410090784,37.75108825040596,0 -25.33947337912854,37.75104076980818,0 -25.33939850092171,37.75098671786664,0 -25.33932260964178,37.75092737608814,0 -25.33924499047647,37.75086219025105,0 -25.33916432329785,37.75079005411217,0 -25.33909061168819,37.75072073734393,0 -25.33901018016547,37.7506421164606,0 -25.33872386945483,37.75035169084255,0 -25.33860622143237,37.75023568211518,0 -25.33848099479974,37.75011961732939,0 -25.338422120216,37.75006852857602,0 -25.33836473076671,37.75002118251324,0 -25.33829462850768,37.74996686859259,0 -25.33822545362812,37.7499172546383,0 -25.33815671898264,37.74987199202293,0 -25.33808809458377,37.74983086461268,0 -25.33801920172292,37.74979365390798,0 -25.3379499163565,37.74976030150661,0 -25.3378800454549,37.74973071471654,0 -25.33780943677745,37.74970482936628,0 -25.3376509192513,37.74965392251674,0 -25.33749864267634,37.74961068784227,0 -25.33735249190496,37.74957509300158,0 -25.33721254220928,37.74954715758715,0 -25.33707884652103,37.74952689442825,0 -25.33695153208025,37.74951432530529,0 -25.33689029558045,37.74951092891089,0 -25.33683068595657,37.74950945876316,0 -25.3367727126024,37.74950991509179,0 -25.33671638414698,37.74951229782721,0 -25.336619753983,37.74951909738841,0 -25.33652693490703,37.74952761503563,0 -25.33643813172228,37.74953783188014,0 -25.33635352031601,37.7495497276733,0 -25.33627328240971,37.74956327542858,0 -25.33619749655538,37.74957846035338,0 -25.3361262596192,37.74959526297769,0 -25.33605964462597,37.7496136659969,0 -25.33599782675571,37.74963361281806,0 -25.33594072321051,37.749655121335,0 -25.33588837459763,37.74967817621555,0</coordinates></LinearRing></outerBoundaryIs>
        </Polygon>
        <Polygon>
          <extrude>0</extrude>          <altitudeMode>clampToGround</altitudeMode>
          <outerBoundaryIs><LinearRing><coordinates> -25.7947933551325,37.8586089383367,0 -25.79460403194117,37.85863485590569,0 -25.79441234031515,37.85866791874339,0 -25.7942209925807,37.85870765728333,0 -25.79403223452107,37.85875360336835,0 -25.7938485313541,37.85880513052835,0 -25.79367098914594,37.85886190129906,0 -25.79350098296444,37.85892347483787,0 -25.79341913809129,37.8589559434574,0 -25.79333955481013,37.85898947234044,0 -25.7932633074627,37.85902357047239,0 -25.79318945283109,37.85905862027295,0 -25.79311807104057,37.85909458369181,0 -25.79304923130258,37.85913142583115,0 -25.79298300443858,37.85916910839533,0 -25.79291943756324,37.8592076041661,0 -25.79285858095565,37.85924688267496,0 -25.79280047787359,37.85928691597934,0 -25.79274520567172,37.85932764796991,0 -25.7926927563841,37.85936908156239,0 -25.79264316074181,37.85941119246309,0 -25.79259644503483,37.85945395833042,0 -25.79255263528811,37.85949735505841,0 -25.79251174912357,37.85954136488982,0 -25.7924738046571,37.85958596830948,0 -25.79243881720145,37.85963114729954,0 -25.79239139756438,37.85970146509612,0 -25.79234749026633,37.85977902271289,0 -25.79230664853106,37.85986459260917,0 -25.79226809578301,37.85995979279349,0 -25.79223844444854,37.86004385276858,0 -25.79220834852563,37.86013904990274,0 -25.79211202225253,37.86047998695462,0 -25.7920714298968,37.86061243457205,0 -25.79196328278209,37.8609452588586,0 -25.79187659114259,37.86122103991889,0 -25.79180087280528,37.86147315039863,0 -25.79173438798309,37.86170759734718,0 -25.79167458250304,37.86193384535425,0 -25.79162219501279,37.86214963727667,0 -25.79157675095928,37.86235693346242,0 -25.79153799916336,37.86255689044649,0 -25.79150500622527,37.86275539528076,0 -25.79147875165249,37.86294785787224,0 -25.79145915704925,37.86313485598158,0 -25.79144617958933,37.86331680394395,0 -25.79143979223709,37.86349415408752,0 -25.79143999415197,37.86366708093925,0 -25.79144678578665,37.86383582496731,0 -25.79146017494104,37.86400057448804,0 -25.79147216194947,37.86409071381665,0 -25.79148982048884,37.86418257029757,0 -25.79151318641502,37.86427633239693,0 -25.7915423209534,37.86437224692772,0 -25.79157726141646,37.86447047072957,0 -25.79161817933063,37.86457151380378,0 -25.79166525968643,37.86467583624167,0 -25.79171881688796,37.86478413659282,0 -25.7917673183735,37.86487551843015,0 -25.79182077634993,37.86497087018808,0 -25.79187972902502,37.86507115780881,0 -25.79194528974369,37.865178278005,0 -25.79207278628783,37.86537796239892,0 -25.79239173235182,37.86586395455164,0 -25.79247607131728,37.86599717770805,0 -25.79254908567174,37.86611710381719,0 -25.79262380863412,37.86624653468654,0 -25.7926890806584,37.86636782658417,0 -25.79274604801354,37.86648311492971,0 -25.79279526056334,37.86659352421686,0 -25.79284275644585,37.86671555402933,0 -25.79286296938605,37.86677487575485,0 -25.79288086855819,37.86683319143312,0 -25.79289648178956,37.86689059432564,0 -25.7929098220227,37.86694713503021,0 -25.79292090340914,37.86700287365673,0 -25.79292973601222,37.86705786100868,0 -25.79293633400734,37.86711220957502,0 -25.79294069023653,37.8671658929285,0 -25.79294280776229,37.86721894903407,0 -25.79294268788395,37.86727141097769,0 -25.79294033025746,37.86732331368286,0 -25.7929357335469,37.86737468063694,0 -25.79292889542455,37.86742553772078,0 -25.79291981277919,37.86747590797456,0 -25.79290947201223,37.86752149418448,0 -25.79289686915842,37.86756776791159,0 -25.79288198206033,37.86761481090345,0 -25.79286477807701,37.86766272656755,0 -25.79282327329064,37.86776159132767,0 -25.7927717553526,37.86786579850944,0 -25.79271212036999,37.86797247041417,0 -25.7926400937766,37.86809001085705,0 -25.79256002620988,37.86821266532306,0 -25.7923272806164,37.86855905528934,0 -25.79225877617234,37.86866694215961,0 -25.79220084010309,37.86876426607719,0 -25.79213979754242,37.86887687558557,0 -25.79208951898239,37.86898286501158,0 -25.79206807862687,37.86903408329076,0 -25.79204903149419,37.86908429565858,0 -25.79203232641872,37.86913363729214,0 -25.79201792856511,37.86918221152201,0 -25.79198712217318,37.86930285697495,0 -25.79196019490814,37.86942650520975,0 -25.79193718959538,37.86955295996614,0 -25.79191814674584,37.86968199899664,0 -25.79190309856148,37.86981341428563,0 -25.79189208016913,37.86994691193747,0 -25.79188511491763,37.87008221019867,0 -25.79188221902761,37.87021899573316,0 -25.79188340659489,37.87035724133168,0 -25.7918886853583,37.87049628624687,0 -25.79189804102614,37.87063575162658,0 -25.79191144621827,37.87077522792563,0 -25.79192886473028,37.87091432372161,0 -25.79195023806244,37.87105256047965,0 -25.79197549581845,37.87118948248162,0 -25.79200455083396,37.87132461680603,0 -25.79202861878473,37.87142211089994,0 -25.79205598786129,37.87152018392639,0 -25.79208665304651,37.87161881789032,0 -25.79212060830226,37.87171799335609,0 -25.79215784742582,37.87181769194876,0 -25.79219836169678,37.87191789008688,0 -25.79224214196633,37.87201856512893,0 -25.79228917756237,37.87211969252083,0 -25.79233946787648,37.8722212688118,0 -25.79239298934902,37.87232324441246,0 -25.7924497268661,37.8724255905106,0 -25.79250966303864,37.87252827572539,0 -25.79257278091657,37.87263127075284,0 -25.79263905680233,37.87273453667358,0 -25.79270846692722,37.87283803643604,0 -25.79278098411765,37.87294172950578,0 -25.79285684963894,37.87304593845079,0 -25.79293578035862,37.87315025283099,0 -25.79301773945435,37.87325462396189,0 -25.79310268492262,37.87335899833607,0 -25.79319057699435,37.87346332672303,0 -25.7932813587605,37.87356754122002,0 -25.79337497452916,37.87367157786989,0 -25.79347136083896,37.87377536612505,0 -25.79357053019885,37.87387891552931,0 -25.79367232831557,37.87398206115736,0 -25.79377667159059,37.87408471827291,0 -25.7938834648453,37.87418679320751,0 -25.7939926197955,37.8742882009996,0 -25.79410400739772,37.87438882120182,0 -25.79421750372578,37.87448854182769,0 -25.79433296806571,37.87458723920648,0 -25.79457150523248,37.87478864104158,0 -25.79471631335091,37.87490796034115,0 -25.79485371789444,37.87501641093276,0 -25.79498069159233,37.87511097501614,0 -25.79510878547119,37.87519969781803,0 -25.79523245158294,37.87527812682898,0 -25.79535328819274,37.87534727251939,0 -25.79547217549759,37.87540763264853,0 -25.79553013932124,37.87543326509327,0 -25.79559123175259,37.87545660804457,0 -25.79565557899398,37.87547770997271,0 -25.79572335206314,37.87549662714205,0 -25.79579465788413,37.87551339589817,0 -25.79586986918052,37.87552810995234,0 -25.79594933334163,37.87554083806517,0 -25.79603359325618,37.87555166769071,0 -25.79618099791359,37.87556533641637,0 -25.7963488989835,37.87557489501882,0 -25.79651207836015,37.87558026752092,0 -25.79690332126476,37.87558887625249,0 -25.79709802182267,37.87559700941404,0 -25.79719296672974,37.87560338968011,0 -25.79728071588341,37.875611280388,0 -25.79736272830944,37.87562081388938,0 -25.79743977080514,37.87563208162316,0 -25.79751773233832,37.87564622943851,0 -25.79759112103234,37.87566257068974,0 -25.79766031611072,37.87568119022553,0 -25.79772557482757,37.8757021578873,0 -25.79778716773584,37.87572556585663,0 -25.79784518924447,37.87575145567423,0 -25.79789977267937,37.87577988700681,0 -25.79795101849076,37.8758109124134,0 -25.79798288556732,37.87583288500206,0 -25.79801425703745,37.8758569330519,0 -25.79804519778416,37.87588310612316,0 -25.79807579013839,37.8759114737237,0 -25.79813624808538,37.87597508033563,0 -25.79819679768152,37.87604897395818,0 -25.79824663359512,37.87611714137993,0 -25.79829979073801,37.87619623233886,0 -25.79846312948693,37.87645895453052,0 -25.79852123217201,37.87654880310559,0 -25.79857857035133,37.87663043599829,0 -25.79863316119244,37.87669993134198,0 -25.79868856613655,37.87676146959048,0 -25.79874433191161,37.87681416844522,0 -25.79880125382097,37.87685877540579,0 -25.79883030209725,37.87687816485437,0 -25.79885981365001,37.87689566094998,0 -25.79890780630678,37.87692066190235,0 -25.79895811468675,37.87694354420857,0 -25.79901074449855,37.87696431047164,0 -25.79906570266677,37.87698296342936,0 -25.79912299531112,37.87699950528511,0 -25.79918263328334,37.87701393929226,0 -25.79924462703846,37.87702626799083,0 -25.79930898938211,37.87703649393546,0 -25.79937570304866,37.87704461612144,0 -25.79944481498016,37.87705064193834,0 -25.79951634486411,37.87705457311846,0 -25.79959031727366,37.87705641102505,0 -25.79966675218914,37.87705615649191,0 -25.79974569164486,37.87705380970209,0 -25.79982717506283,37.87704936951334,0 -25.799911253295,37.87704283317793,0 -25.80008095719258,37.87702428936764,0 -25.80026114071622,37.87699786380748,0 -25.80045262239599,37.87696344010996,0 -25.8006570724929,37.87692071981959,0 -25.80086621263025,37.87687182935759,0 -25.80109500499358,37.8768136267967,0 -25.80133860190894,37.87674774998716,0 -25.80171615149894,37.87664192665127,0 -25.80196614983046,37.87657001479009,0 -25.8021948498377,37.87650025927149,0 -25.80240831551721,37.87643080661498,0 -25.8026082818149,37.87636107892102,0 -25.80279697884257,37.87629025835034,0 -25.80297390962589,37.87621848726482,0 -25.80313950186298,37.87614559168025,0 -25.8032939772811,37.87607147311598,0 -25.80343856000743,37.8759954685226,0 -25.80357212109559,37.87591808952569,0 -25.80369473302985,37.87583929399012,0 -25.80375194635755,37.87579935648959,0 -25.80380643687454,37.87575905530635,0 -25.80385821516952,37.87571838209415,0 -25.80390727573746,37.87567734063483,0 -25.8039536207227,37.875635929132,0 -25.80399725170302,37.87559414617283,0 -25.80403817034001,37.87555199012684,0 -25.80407637721388,37.87550946035422,0 -25.80411187311576,37.87546655597252,0 -25.80414465858805,37.87542327632387,0 -25.80417438700264,37.87538037306009,0 -25.80420279120879,37.87533572449269,0 -25.80422986280501,37.87528934381632,0 -25.80425559304391,37.87524124600618,0 -25.80427997416481,37.87519144531844,0 -25.80430299620646,37.87513996183638,0 -25.80432465034112,37.8750868152808,0 -25.80434492743041,37.8750320280605,0 -25.80436382741435,37.8749755963912,0 -25.8043813308766,37.87491757401239,0 -25.80441211244253,37.87479687913316,0 -25.80443720294546,37.87467021288894,0 -25.80445653239686,37.87453792678797,0 -25.80447014133249,37.8743990961039,0 -25.80447776462228,37.87425549573514,0 -25.80447936811494,37.87410775177941,0 -25.80447494210356,37.8739566917873,0 -25.80446448396862,37.87380292572784,0 -25.80444808058305,37.87364802447085,0 -25.8044258789161,37.87349339234224,0 -25.80439813632101,37.87334083229863,0 -25.80437793321109,37.87325151641214,0 -25.80435301301802,37.8731607056651,0 -25.80432333777448,37.87306826091256,0 -25.80428884974986,37.87297400179511,0 -25.80424951065389,37.87287780788984,0 -25.80420517914235,37.87277931998966,0 -25.80415571012644,37.87267821421229,0 -25.80410087225325,37.8725740167563,0 -25.80404488665047,37.87247400101679,0 -25.80398359854101,37.87237008244413,0 -25.80391646515792,37.87226133537712,0 -25.80384237981677,37.87214596460713,0 -25.80368817287994,37.87191613440004,0 -25.80338559608788,37.87147931733441,0 -25.80334470772075,37.87142148287231,0 -25.80330159053544,37.87136387437088,0 -25.80325622500915,37.87130646572588,0 -25.80320858811125,37.871249227776,0 -25.80315865856943,37.87119213458379,0 -25.80310640241286,37.87113514694678,0 -25.80299477017639,37.87102133740178,0 -25.80287352639066,37.87090761128185,0 -25.80274206666802,37.87079338394531,0 -25.80259980561483,37.87067814448442,0 -25.80244581012812,37.87056113565684,0 -25.80231076793712,37.8704638109971,0 -25.80216598825253,37.87036387571522,0 -25.80201002357102,37.87026032568209,0 -25.80183995442271,37.87015122021889,0 -25.80151516475475,37.86995049040689,0 -25.8009317942371,37.86959994404702,0 -25.80071354244092,37.86946729278021,0 -25.8004980926618,37.8693330811573,0 -25.80030843303252,37.86921075879306,0 -25.80010860138313,37.86907583084398,0 -25.79992834867519,37.86894684671816,0 -25.79976445125569,37.86882149498794,0 -25.79968811374989,37.86875978131569,0 -25.79961529270637,37.86869852959533,0 -25.79953456991055,37.8686274748282,0 -25.79945828667362,37.86855674768362,0 -25.7993863008435,37.86848621624085,0 -25.79931850269891,37.86841577283413,0 -25.79925478037572,37.86834529945276,0 -25.79919507688109,37.8682747311483,0 -25.79913932624503,37.86820398987027,0 -25.79908747572325,37.86813300859663,0 -25.79903942088838,37.86806163371105,0 -25.79899519253507,37.86798989942037,0 -25.79895475822295,37.86791775305225,0 -25.7989180918207,37.86784514790954,0 -25.79888516840984,37.86777203367829,0 -25.7988559729587,37.86769837588715,0 -25.79883049022726,37.86762413603394,0 -25.79880870826161,37.86754927922474,0 -25.79878612481889,37.86745770762765,0 -25.79876612140199,37.86736305324216,0 -25.79874868171576,37.86726523932678,0 -25.79873378804099,37.86716416683699,0 -25.79872142785704,37.86705976336239,0 -25.79871157712043,37.86695184072479,0 -25.79870421977672,37.86684022514283,0 -25.79869933975583,37.86672467492012,0 -25.79869694388157,37.86660685004313,0 -25.79869692647104,37.86648453596,0 -25.79869928675124,37.86635724459464,0 -25.79870403907487,37.8662241789264,0 -25.79871113545349,37.86608573242722,0 -25.79872070892416,37.8659386987473,0 -25.79874837853827,37.8656031046989,0 -25.79875916315143,37.86551039201646,0 -25.79877479455394,37.86541568034917,0 -25.79879530349261,37.86531878153504,0 -25.79882074204368,37.8652194484391,0 -25.79885114200038,37.86511752401272,0 -25.79888664817407,37.86501249572652,0 -25.7989274161699,37.86490390012025,0 -25.79897370958703,37.86479103319964,0 -25.79901595655564,37.8646948726925,0 -25.79906249680197,37.86459445805506,0 -25.79911379136855,37.86448878852684,0 -25.79917079333858,37.86437589792825,0 -25.79928204324272,37.8641645260934,0 -25.79956079255381,37.86364902015271,0 -25.7996346890554,37.8635073279166,0 -25.79969844405279,37.86338014619989,0 -25.79976411033069,37.86324179868872,0 -25.79982106134474,37.86311268339454,0 -25.79987032804135,37.86299045685458,0 -25.79991239890428,37.86287389352494,0 -25.79995326977809,37.86274227519709,0 -25.79997023025117,37.86267858984431,0 -25.79998491301403,37.86261617846468,0 -25.79999734245109,37.8625549337588,0 -25.80000752931674,37.86249479837485,0 -25.80001548515437,37.86243570397491,0 -25.8000212176592,37.86237759310433,0 -25.80002473518583,37.86232033853397,0 -25.80002603155961,37.86226397125555,0 -25.80002510773647,37.86220844885013,0 -25.80002196308109,37.86215373451138,0 -25.80001659508281,37.86209978953134,0 -25.80000900087455,37.86204658803395,0 -25.7999991763809,37.86199410155803,0 -25.79998711686337,37.86194230486608,0 -25.7999649931396,37.86186200638595,0 -25.79993947957324,37.86178064971694,0 -25.79991060070321,37.86169831317782,0 -25.7998783862148,37.86161508146427,0 -25.79984286722568,37.86153103594625,0 -25.79980408615428,37.86144627787564,0 -25.79976208785233,37.86136090532728,0 -25.7997169238724,37.86127502314001,0 -25.79966861491909,37.86118867672025,0 -25.79961725690041,37.86110204314003,0 -25.79956291973184,37.86101524037214,0 -25.79950568113092,37.86092839260346,0 -25.79944562012175,37.860841620244,0 -25.79938283229021,37.86075506187511,0 -25.79931741494156,37.86066885166351,0 -25.7992494731583,37.86058312811621,0 -25.79917885987683,37.86049772556012,0 -25.79910593452058,37.86041309791855,0 -25.79903082139474,37.86032938945502,0 -25.79895365105448,37.8602467456777,0 -25.79887455682716,37.86016530947845,0 -25.79879368015079,37.86008522659131,0 -25.79871116438263,37.86000663896591,0 -25.79862715596553,37.85992968607575,0 -25.79854181606795,37.85985451490393,0 -25.79845528276132,37.85978124643326,0 -25.79836770730034,37.8597100087219,0 -25.79827924015859,37.85964092416359,0 -25.79819003636495,37.859574113596,0 -25.79810023953622,37.85950968436147,0 -25.79800999671439,37.8594477419454,0 -25.79791945073682,37.85938838437534,0 -25.79771148914159,37.85925885217068,0 -25.7975157993898,37.85914451770858,0 -25.79742103000216,37.85909215543308,0 -25.79732806116235,37.85904286304493,0 -25.79723668554566,37.85899653074984,0 -25.79714676348344,37.85895308791821,0 -25.79705774240909,37.85891228386141,0 -25.79696998228479,37.85887430013681,0 -25.79688340788273,37.8588391042295,0 -25.79679796329146,37.85880667346819,0 -25.79671358634602,37.85877698482276,0 -25.79663025241275,37.85875003020527,0 -25.79654792779196,37.85872579873472,0 -25.79646658611322,37.85870428267334,0 -25.79637203068794,37.8586820453603,0 -25.79627478299759,37.85866181175769,0 -25.79617507359398,37.85864362989116,0 -25.79607315928883,37.85862754664476,0 -25.79596928762994,37.85861360197452,0 -25.79586377932252,37.85860183980988,0 -25.79575694554154,37.85859229488544,0 -25.79564912082251,37.85858499713716,0 -25.79554049126237,37.85857996428327,0 -25.79543157934113,37.85857722563068,0 -25.79532275692187,37.85857679055047,0 -25.79521440610971,37.85857866059787,0 -25.79510690628959,37.85858282936583,0 -25.79500064606726,37.85858928193463,0 -25.79489600540155,37.85859799521936,0 -25.7947933551325,37.8586089383367,0</coordinates></LinearRing></outerBoundaryIs>
        </Polygon>
      </MultiGeometry>
    </Placemark>
  </Folder>
  <Style id="PolyStyle00">
    <LabelStyle>
      <color>00000000</color>
      <scale>0.000000</scale>
    </LabelStyle>
    <LineStyle>
      <color>ff00ffff</color>
      <width>1.500000</width>
    </LineStyle>
    <PolyStyle>
      <color>00f0f0f0</color>
      <outline>1</outline>
    </PolyStyle>
  </Style>
</Document>
</kml>
